# Supplementary material for: Measurement report: Receptor modelling for source identification of urban fine and coarse particulate matter using hourly elemental composition
Source: Copernicus journal article supplement (doi:10.5194/acp-2021-253), 2021-04-19
Supplement: Supplementary file 1 [file acp-2021-253-supplement.pdf]

# Measurement report: Receptor modelling for source identification of urban fine and coarse particulate matter using hourly elemental composition

5 Magdalena Reizer<sup>1</sup>, Giulia Calzolari<sup>2</sup>, Katarzyna Maciejewska<sup>1</sup>, José A. G. Orza<sup>3</sup>, Silvia Nava<sup>2</sup>, Franco Lucarelli<sup>2</sup>, Katarzyna Juda-Rezler<sup>1</sup>

<sup>1</sup> Faculty of Building Services, Hydro and Environmental Engineering, Warsaw University of Technology, Warsaw, Poland

<sup>2</sup> Department of Physics and Astronomy, University of Florence and National Institute of Nuclear Physics (INFN), Sesto Fiorentino, Italy

<sup>3</sup> SCOLAB, Física Aplicada, Universidad Miguel Hernández, Elche, Spain

10 *Correspondence to:* Magdalena Reizer (magdalena.reizer@pw.edu.pl)

*Supplementary Material*

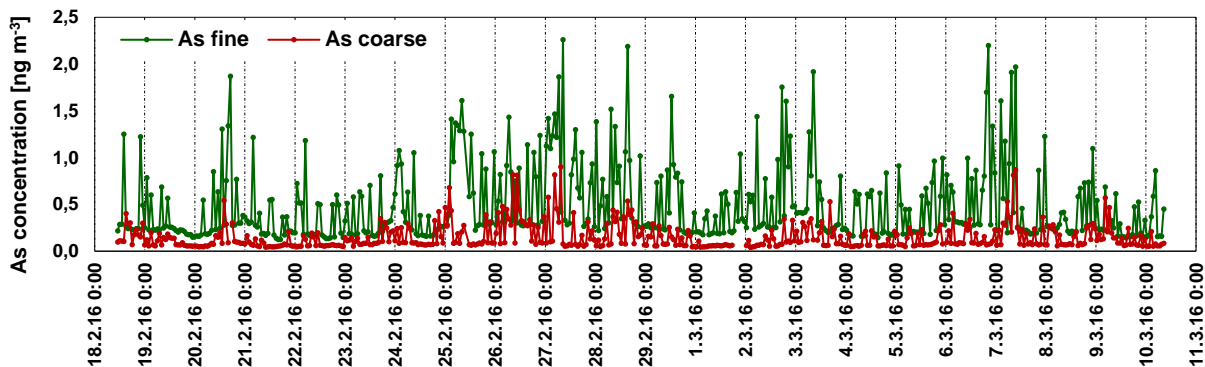

Figure S1: Hourly concentrations ( $\text{ng m}^{-3}$ ) of As measured in the fine (green) and coarse (red) fractions.

15

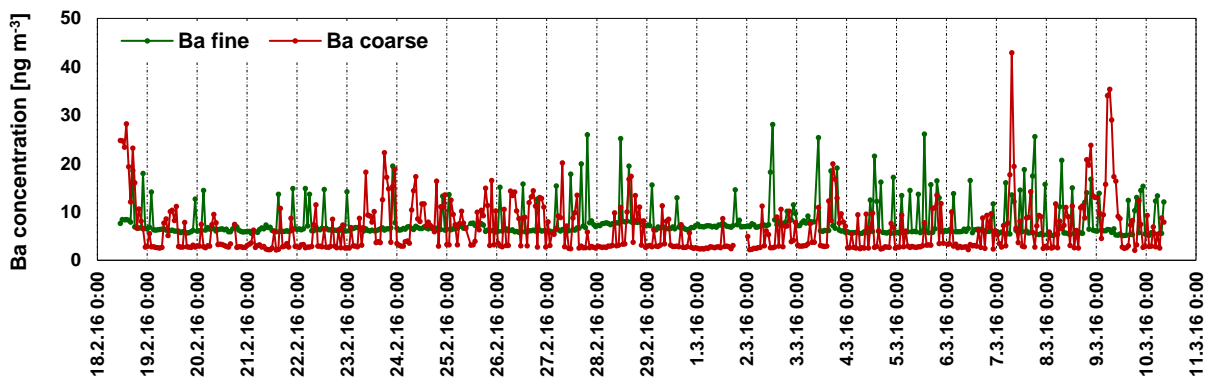

Figure S2: Hourly concentrations ( $\text{ng m}^{-3}$ ) of Ba measured in the fine (green) and coarse (red) fractions.

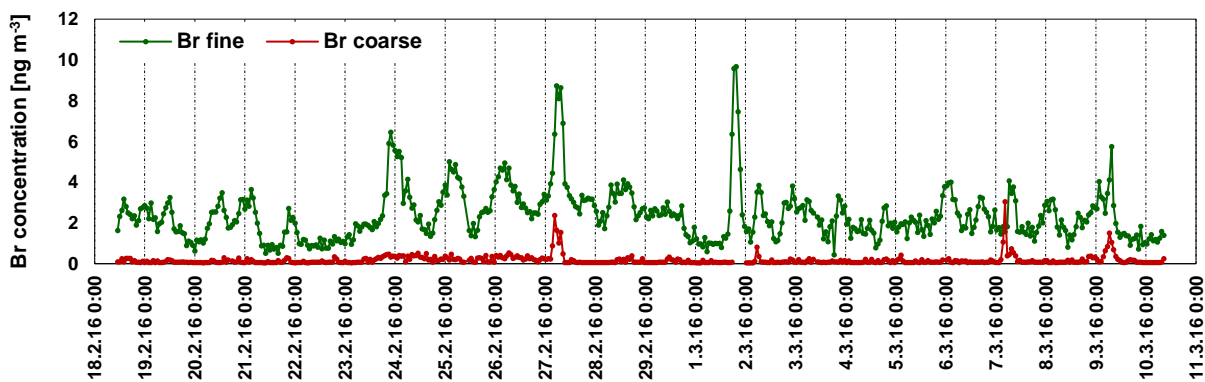

20 Figure S3: Hourly concentrations ( $\text{ng m}^{-3}$ ) of Br measured in the fine (green) and coarse (red) fractions.

25

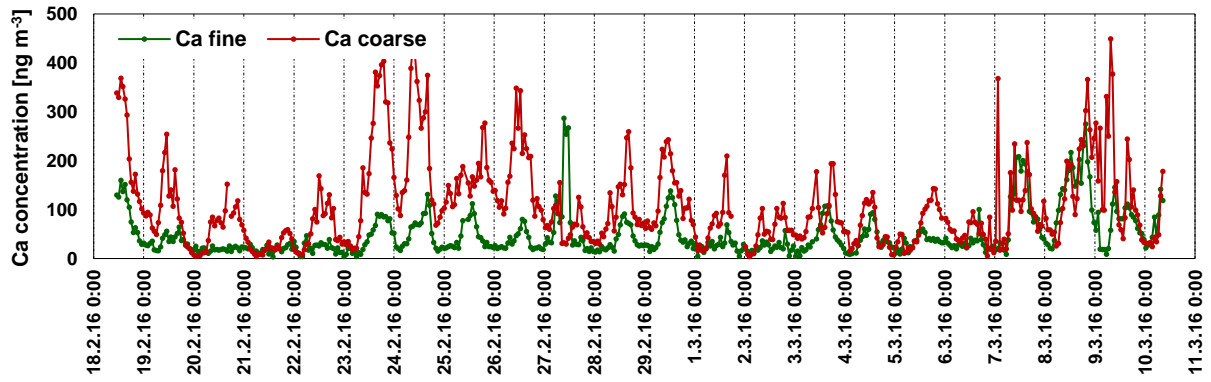

Figure S4: Hourly concentrations ( $\text{ng m}^{-3}$ ) of Ca measured in the fine (green) and coarse (red) fractions.

30

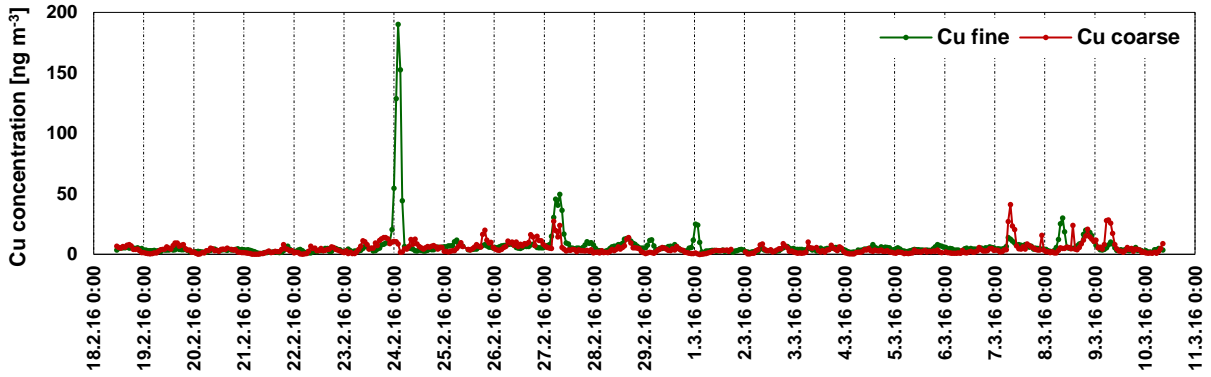

Figure S5: Hourly concentrations ( $\text{ng m}^{-3}$ ) of Cu measured in the fine (green) and coarse (red) fractions.

35

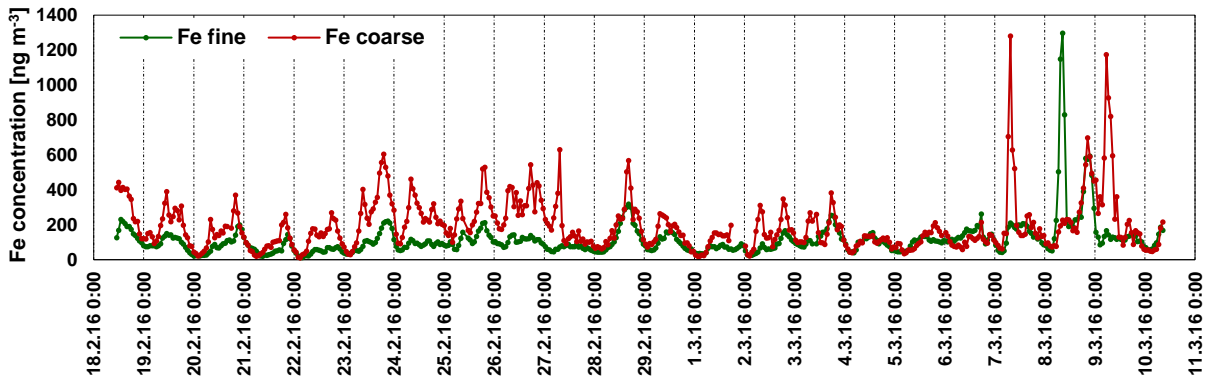

Figure S6: Hourly concentrations ( $\text{ng m}^{-3}$ ) of Fe measured in the fine (green) and coarse (red) fractions.

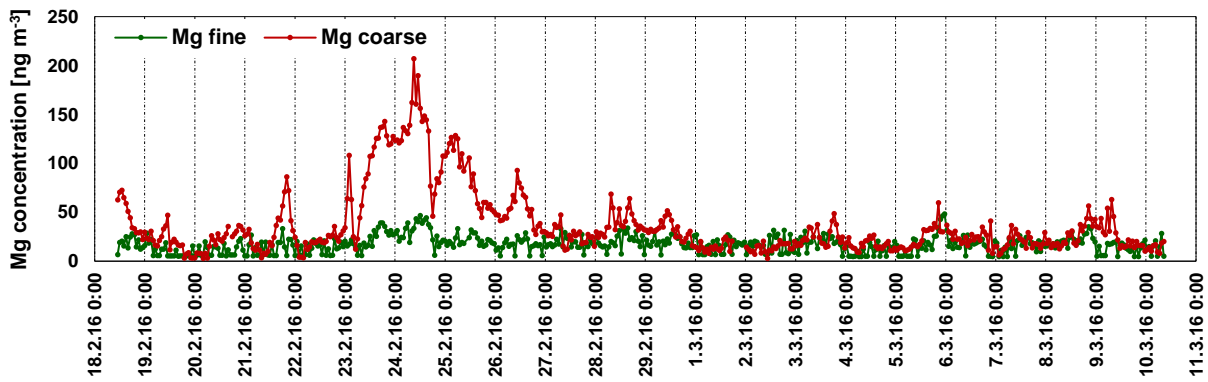

Figure S7: Hourly concentrations ( $\text{ng m}^{-3}$ ) of Mg measured in the fine (green) and coarse (red) fractions.

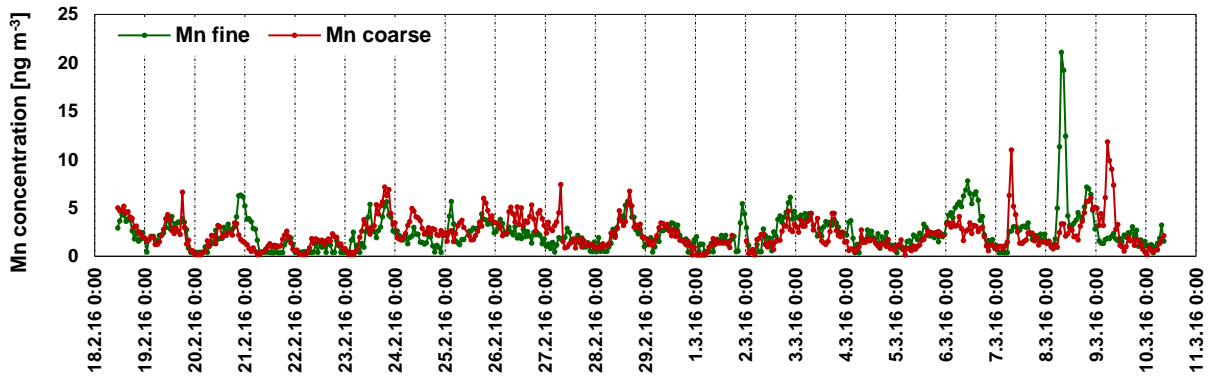

Figure S8: Hourly concentrations ( $\text{ng m}^{-3}$ ) of Mn measured in the fine (green) and coarse (red) fractions.

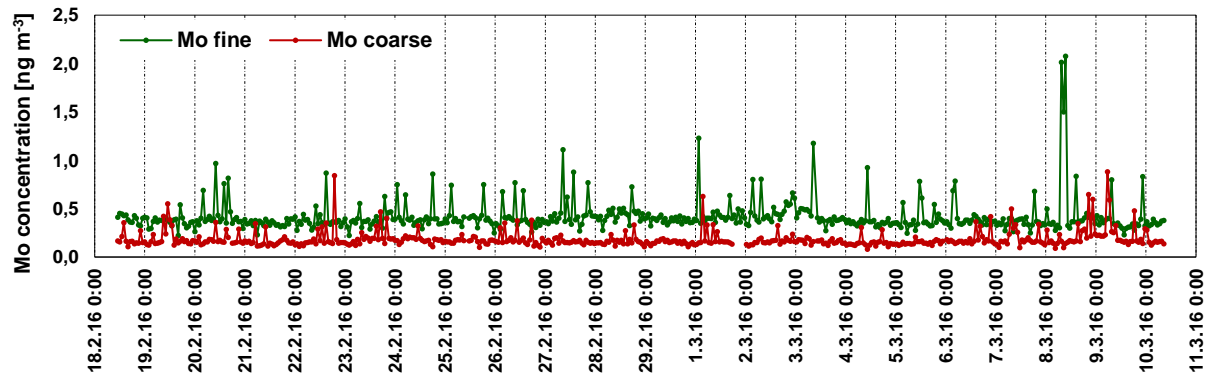

Figure S9: Hourly concentrations ( $\text{ng m}^{-3}$ ) of Mo measured in the fine (green) and coarse (red) fractions.

40

45

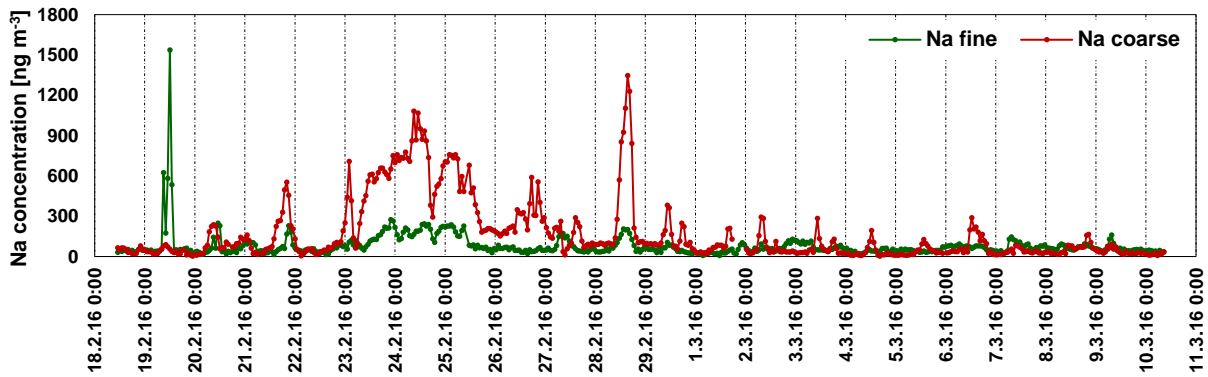

50 Figure S10: Hourly concentrations ( $\text{ng m}^{-3}$ ) of Na measured in the fine (green) and coarse (red) fractions.

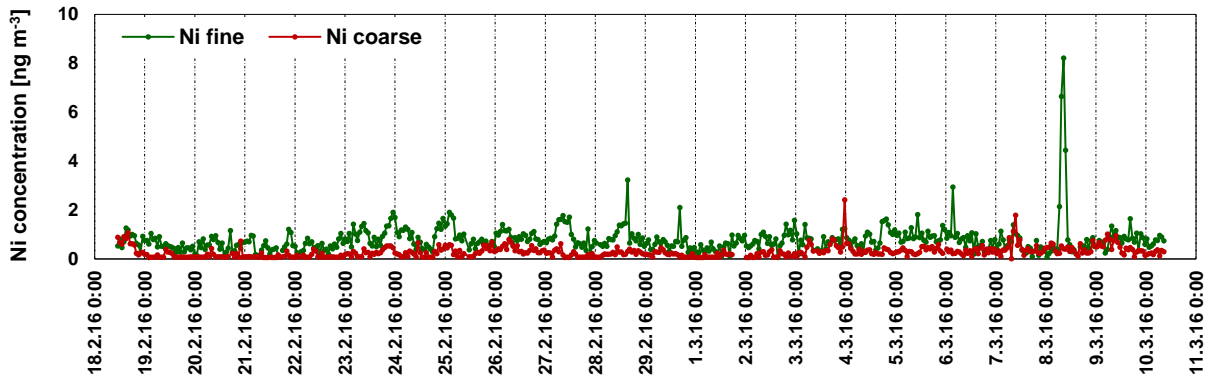

Figure S11: Hourly concentrations ( $\text{ng m}^{-3}$ ) of Ni measured in the fine (green) and coarse (red) fractions.

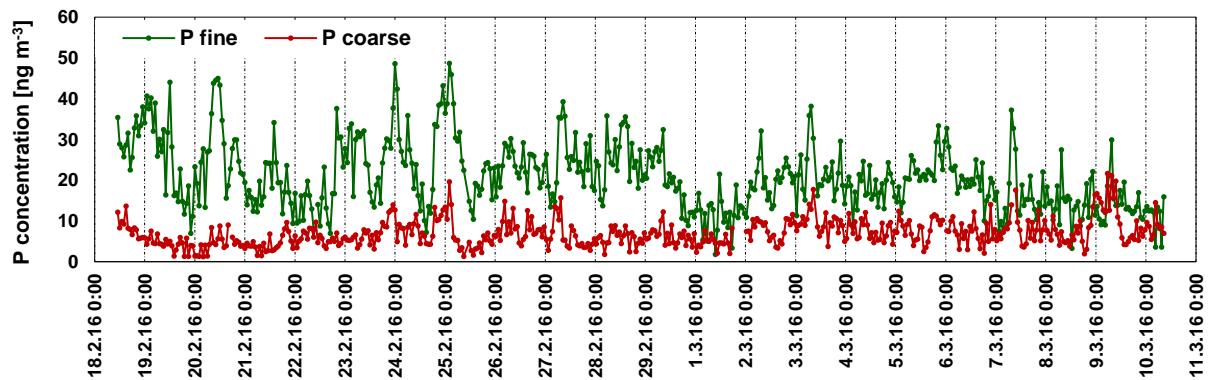

55 Figure S12: Hourly concentrations ( $\text{ng m}^{-3}$ ) of P measured in the fine (green) and coarse (red) fractions.

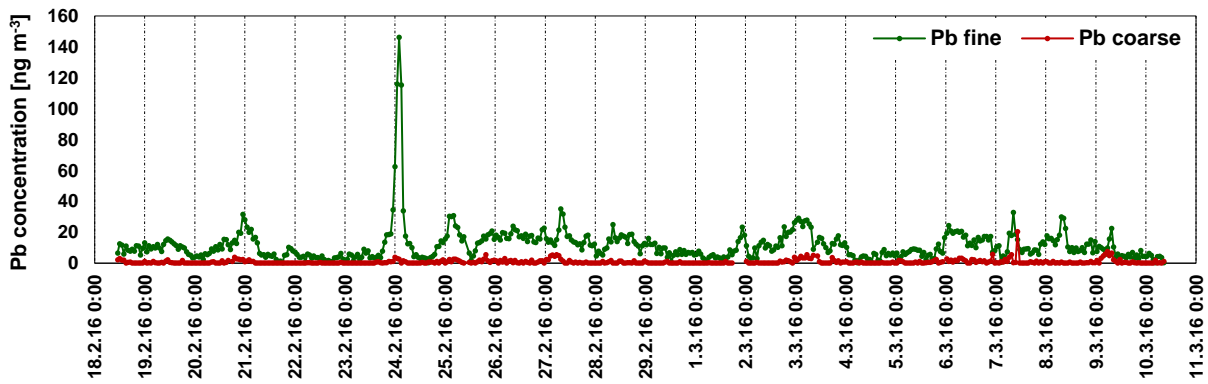

60

Figure S13: Hourly concentrations ( $\text{ng m}^{-3}$ ) of Pb measured in the fine (green) and coarse (red) fractions.

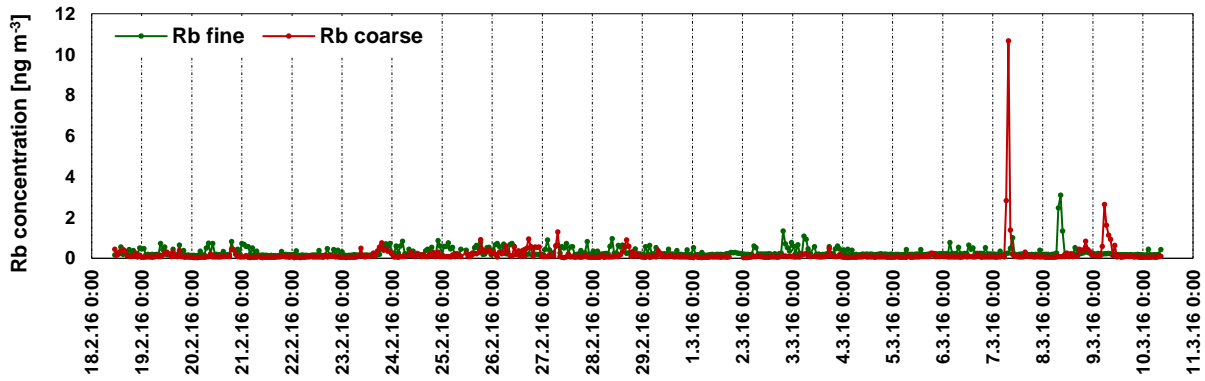

65

Figure S14: Hourly concentrations ( $\text{ng m}^{-3}$ ) of Rb measured in the fine (green) and coarse (red) fractions.

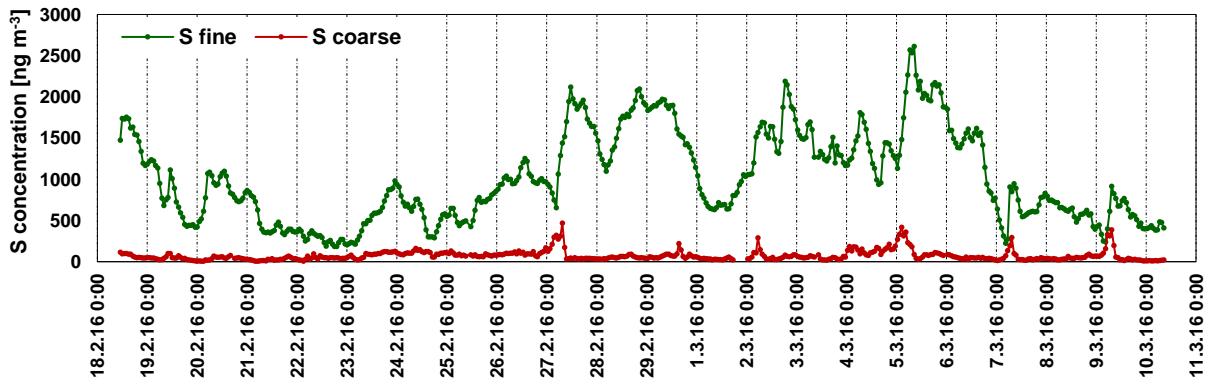

Figure S15: Hourly concentrations ( $\text{ng m}^{-3}$ ) of S measured in the fine (green) and coarse (red) fractions.

70

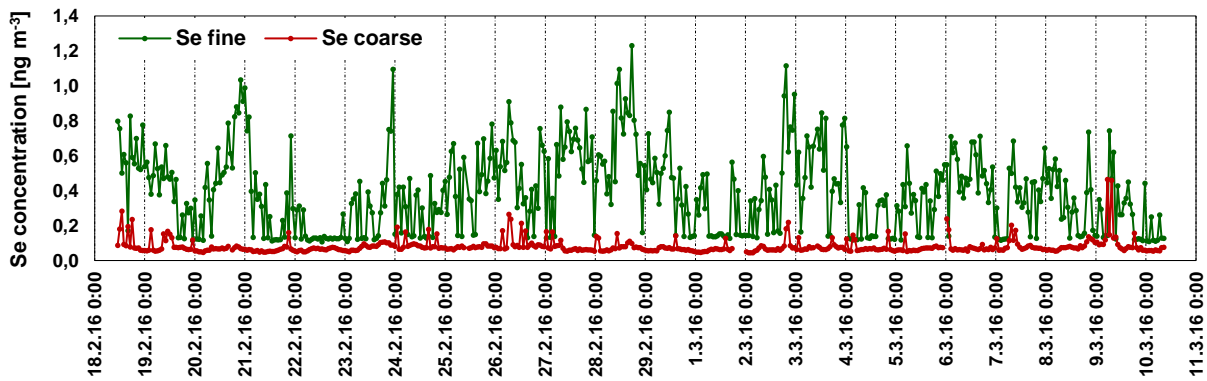

Figure S16: Hourly concentrations (ng m<sup>-3</sup>) of Se measured in the fine (green) and coarse (red) fractions.

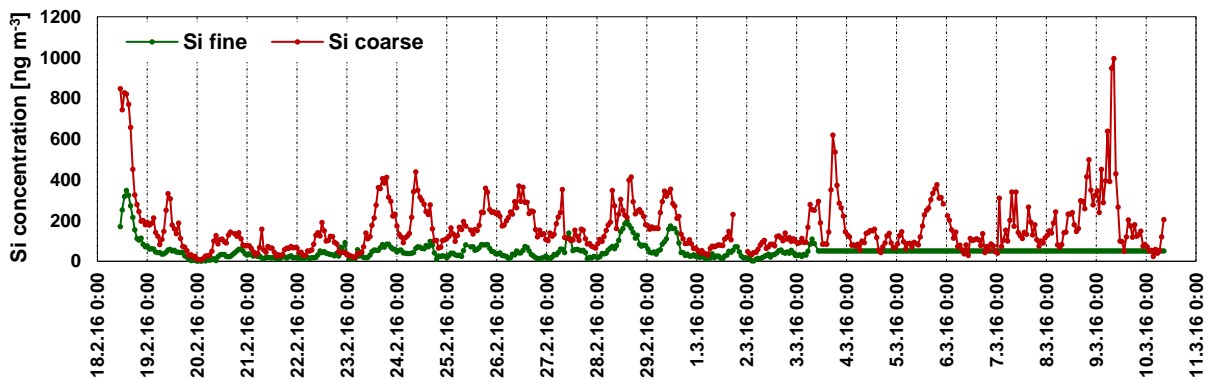

75 Figure S17: Hourly concentrations (ng m<sup>-3</sup>) of Si measured in the fine (green) and coarse (red) fractions.

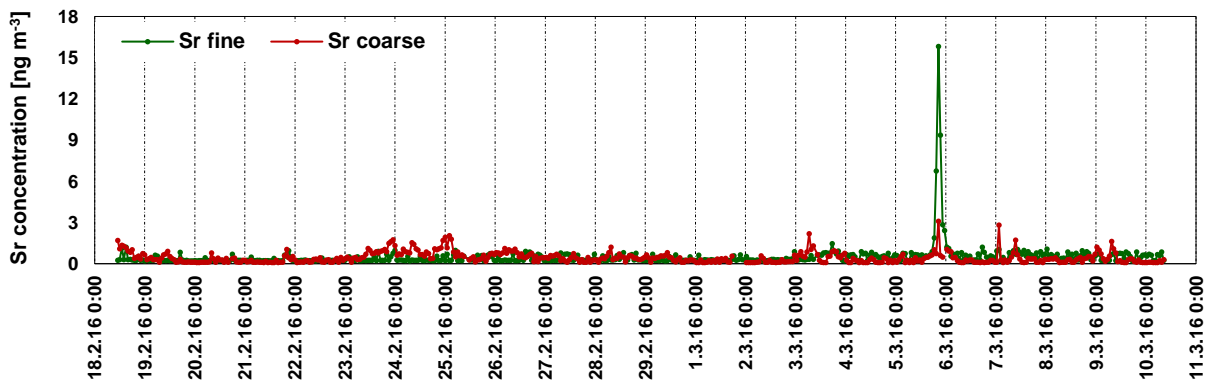

Figure S18: Hourly concentrations (ng m<sup>-3</sup>) of Sr measured in the fine (green) and coarse (red) fractions.

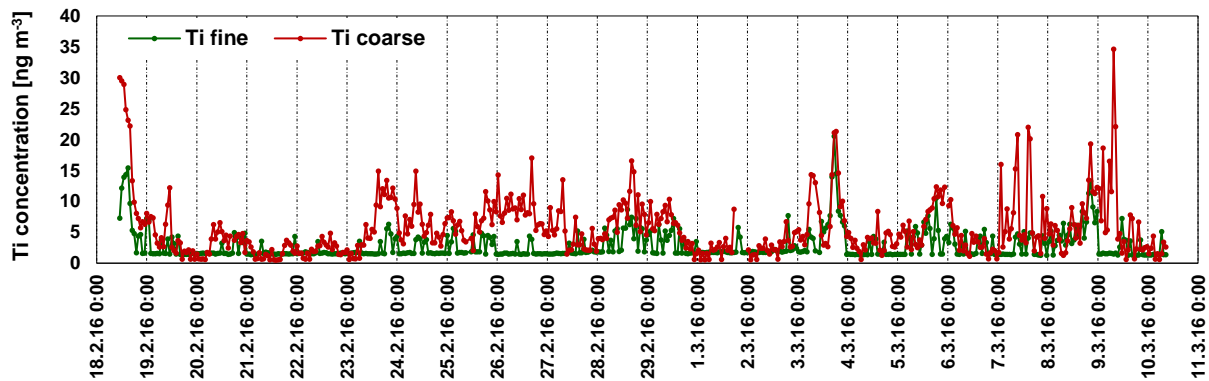

Figure S19: Hourly concentrations ( $\text{ng m}^{-3}$ ) of Ti measured in the fine (green) and coarse (red) fractions.

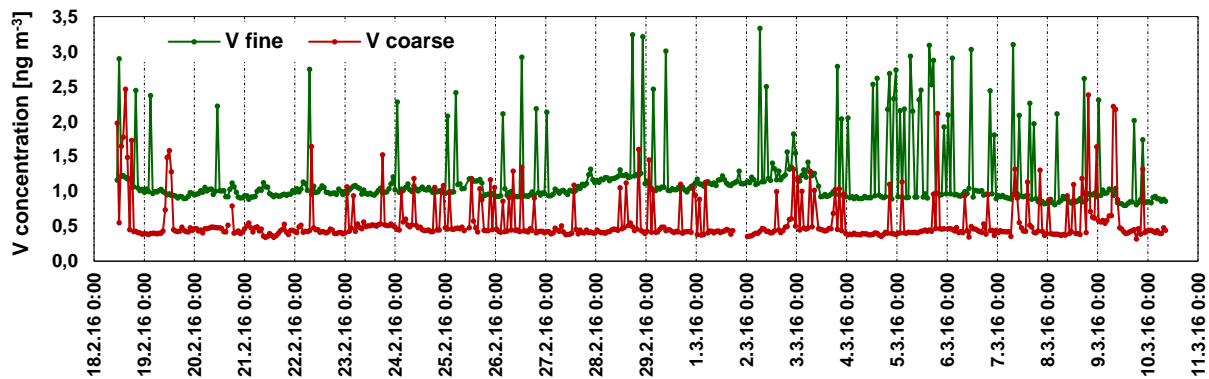

85

Figure S20: Hourly concentrations ( $\text{ng m}^{-3}$ ) of V measured in the fine (green) and coarse (red) fractions.

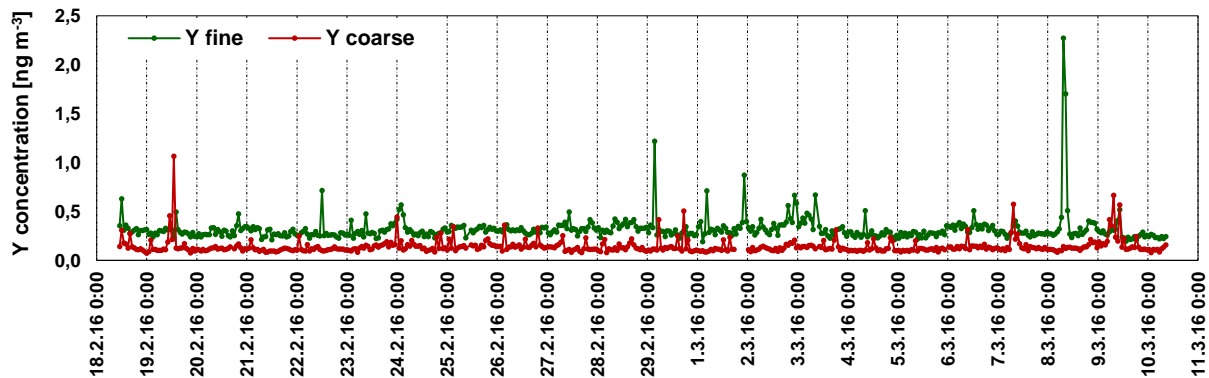

Figure S21: Hourly concentrations ( $\text{ng m}^{-3}$ ) of Y measured in the fine (green) and coarse (red) fractions.

90



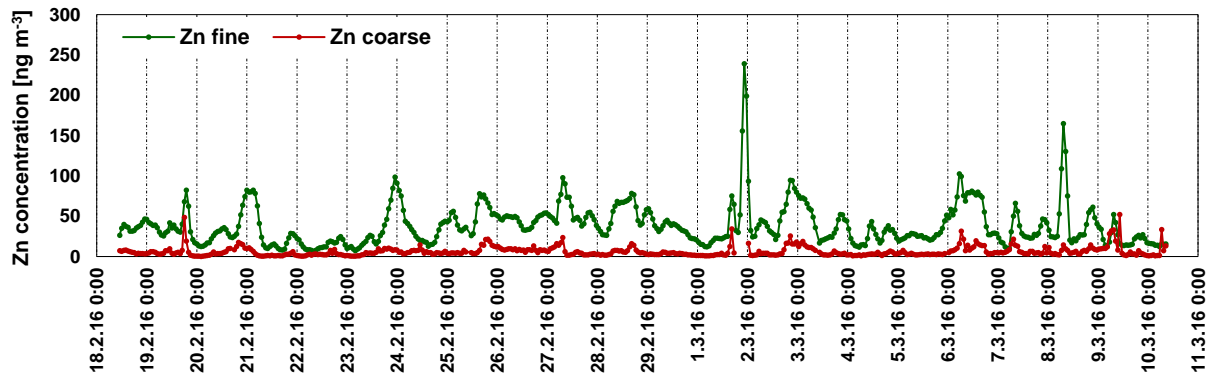

Figure S22: Hourly concentrations ( $\text{ng m}^{-3}$ ) of Zn measured in the fine (green) and coarse (red) fractions.

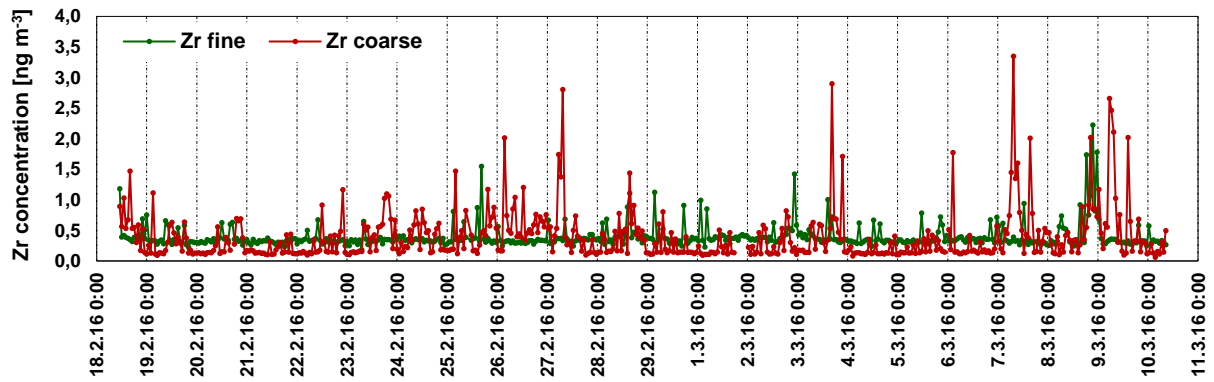

95 Figure S23: Hourly concentrations ( $\text{ng m}^{-3}$ ) of Zr measured in the fine (green) and coarse (red) fractions.
